# Supplementary material for: Resources to Guide Exercise Specialists Managing Adults with Diabetes
Source: Sports Med Open. 2019 Jun 3;5:20. doi: 10.1186/s40798-019-0192-1 (PMC6546780; doi:10.1186/s40798-019-0192-1)
Supplement: Supplementary file 2 — Type 2 Diabetes Exercise Action Plan (on Insulin and/or Sulphonylureas). (PDF 114 kb) [file 40798_2019_192_MOESM2_ESM.pdf]

## Type 2 Diabetes Exercise Action Plan (on Insulin and/or Sulphonylureas)

This resource is designed to be used by an Exercise Specialist with diabetes knowledge.

### Guidelines for Starting Exercise

| Glucose Level:                                                                                                                                                                                                                                                                                                                                                                                                                                                                                                                                                                                                | OK to exercise                                                                                                                                                                                                                                                                                                                                                                                                                                                                                                                                                                                                                                                                                   |                                                                                   |                                                                                     |                                                                              |                                                                                                                                                               |
|---------------------------------------------------------------------------------------------------------------------------------------------------------------------------------------------------------------------------------------------------------------------------------------------------------------------------------------------------------------------------------------------------------------------------------------------------------------------------------------------------------------------------------------------------------------------------------------------------------------|--------------------------------------------------------------------------------------------------------------------------------------------------------------------------------------------------------------------------------------------------------------------------------------------------------------------------------------------------------------------------------------------------------------------------------------------------------------------------------------------------------------------------------------------------------------------------------------------------------------------------------------------------------------------------------------------------|-----------------------------------------------------------------------------------|-------------------------------------------------------------------------------------|------------------------------------------------------------------------------|---------------------------------------------------------------------------------------------------------------------------------------------------------------|
| * Ensure medication taken as prescribed.<br>* Ensure adequate fluid intake                                                                                                                                                                                                                                                                                                                                                                                                                                                                                                                                    | * Have blood glucose level monitor<br>* Avoid exercise in extremes of temperature<br>* If previous foot or nerve problems check feet before and after exercise.<br>* If taking sulphonylureas, risk of hypoglycaemia is increased when exercising after a meal                                                                                                                                                                                                                                                                                                                                                                                                                                   |                                                                                   |                                                                                     |                                                                              |                                                                                                                                                               |
| <b>Establish glucose trend by measuring glucose levels 2-3 times (e.g. every 30 mins) before exercise.</b> If glucose level is falling and it has been >90 min since eating, then consider one serve of slow acting carbohydrate – dependent on duration and intensity of exercise, the carbohydrate intake and glucose level prior to starting exercise.                                                                                                                                                                                                                                                     |                                                                                                                                                                                                                                                                                                                                                                                                                                                                                                                                                                                                                                                                                                  |                                                                                   |                                                                                     |                                                                              |                                                                                                                                                               |
| <b>5.5 – 15.0mmol/L</b>                                                                                                                                                                                                                                                                                                                                                                                                                                                                                                                                                                                       | If on insulin – carry one serve of fast acting carbohydrate when exercising, especially when > 60min.<br>If on a sulphonylurea – carry one serve of slow acting carbohydrate when exercising, especially when > 60min.                                                                                                                                                                                                                                                                                                                                                                                                                                                                           |                                                                                   |                                                                                     |                                                                              |                                                                                                                                                               |
| Glucose Level:                                                                                                                                                                                                                                                                                                                                                                                                                                                                                                                                                                                                | Below target glucose – Delay exercise or do not exercise                                                                                                                                                                                                                                                                                                                                                                                                                                                                                                                                                                                                                                         |                                                                                   |                                                                                     |                                                                              |                                                                                                                                                               |
| <b>4.0 – 5.4mmol/L</b>                                                                                                                                                                                                                                                                                                                                                                                                                                                                                                                                                                                        | Delay Exercise – Consume one to two serves of fast acting carbohydrate.<br>- If accustomed to exercise and their own glucose response to this starting level = may start exercising. Follow with slow acting carbohydrate if exercise duration >30 min and/or next meal is more than 30 min away. Monitor glucose trend during exercise.<br>- If unaccustomed to exercise and/or glucose response to starting level, wait 15 min after consuming the carbohydrate and then re-test. OK to exercise when glucose ≥5.5mmol/L and feeling well. Follow with slow acting carbohydrate if exercise duration >30 min and/or next meal is more than 30 min away. Monitor glucose trend during exercise. |                                                                                   |                                                                                     |                                                                              |                                                                                                                                                               |
| Glucose Level:                                                                                                                                                                                                                                                                                                                                                                                                                                                                                                                                                                                                | Hyperglycaemia, but feel well – Exercise with caution                                                                                                                                                                                                                                                                                                                                                                                                                                                                                                                                                                                                                                            |                                                                                   |                                                                                     |                                                                              |                                                                                                                                                               |
| <b>&gt;15.0mmol/L</b>                                                                                                                                                                                                                                                                                                                                                                                                                                                                                                                                                                                         | <b>If Likely Due to Food</b> – If feeling well and usual medications have been taken - perform exercise with caution (may be beneficial in lowering glucose). Monitor the glucose level during exercise and increase fluid intake.<br><b>If Likely Due to Missed Medication</b> – If feeling well - low-intensity exercise only and catch up on missed medications as soon as possible and increase fluid intake.                                                                                                                                                                                                                                                                                |                                                                                   |                                                                                     |                                                                              |                                                                                                                                                               |
| Glucose Level:                                                                                                                                                                                                                                                                                                                                                                                                                                                                                                                                                                                                | Hypoglycaemia or Hyperglycaemia - Do not exercise or delay exercise                                                                                                                                                                                                                                                                                                                                                                                                                                                                                                                                                                                                                              |                                                                                   |                                                                                     |                                                                              |                                                                                                                                                               |
| DO NOT EXERCISE – If hypoglycaemic event within the previous 24 h that required assistance from another individual to treat the event.<br>DO NOT EXERCISE – If hypoglycaemic event within the previous 24 h that did not require assistance but the intended exercise is potentially unsafe (e.g. swimming, skiing, surfing, etc.).<br>DO NOT EXERCISE UNTIL SYMPTOMS IMPROVE – If feeling unwell (e.g. abnormal sweating, trembling, anxiety, hunger, weakness, dizziness, inability to think straight)                                                                                                      |                                                                                                                                                                                                                                                                                                                                                                                                                                                                                                                                                                                                                                                                                                  |                                                                                   |                                                                                     |                                                                              |                                                                                                                                                               |
| <b>&lt;4.0mmol/L</b>                                                                                                                                                                                                                                                                                                                                                                                                                                                                                                                                                                                          | Delay Exercise – Treat hypoglycaemia: Consume one serve of fast acting carbohydrates and re-test after 15 min. If still wishing to exercise, ensure glucose level is ≥5.5mmol/L and follow up with one serve of slow acting carbohydrate. Do low to moderate intensity exercise and closely monitor glucose, re-test every 15 min.<br>DO NOT EXERCISE – If alone or type of exercise is potentially unsafe (e.g. swimming, skiing, surfing, etc.).<br><b>If glucose level is frequently &lt;4.0mmol/L, schedule review with a Diabetes Healthcare Professional.</b>                                                                                                                              |                                                                                   |                                                                                     |                                                                              |                                                                                                                                                               |
| <b>&gt;15.0mmol/L</b>                                                                                                                                                                                                                                                                                                                                                                                                                                                                                                                                                                                         | DO NOT EXERCISE – If feeling unwell, tired, weak, thirsty and/or frequently urinating.<br><b>If glucose level is frequently &gt;15.0mmol/L, schedule review with a Diabetes Healthcare Professional.</b>                                                                                                                                                                                                                                                                                                                                                                                                                                                                                         |                                                                                   |                                                                                     |                                                                              |                                                                                                                                                               |
| <table border="1" style="width: 100%; border-collapse: collapse;"> <tr> <th style="text-align: left;">Fast Acting Carbohydrate (15g=one serve) examples: One serve as initial treatment</th><th style="text-align: left;">Slow Acting Carbohydrate (15g=one serve) examples: One serve as follow up treatment</th></tr> <tr> <td>- 100mL Lucozade<br/>- 3 teaspoons honey, jam or sugar<br/>- 3 glucose tablets</td><td>- 250mL plain milk<br/>- 2 sweet plain biscuits<br/>- 1 tub (200g) yoghurt<br/>- 1 piece of fruit<br/>- 1 slice of bread<br/>- next meal (if served within 30 min)</td></tr> </table> |                                                                                                                                                                                                                                                                                                                                                                                                                                                                                                                                                                                                                                                                                                  | Fast Acting Carbohydrate (15g=one serve) examples: One serve as initial treatment | Slow Acting Carbohydrate (15g=one serve) examples: One serve as follow up treatment | - 100mL Lucozade<br>- 3 teaspoons honey, jam or sugar<br>- 3 glucose tablets | - 250mL plain milk<br>- 2 sweet plain biscuits<br>- 1 tub (200g) yoghurt<br>- 1 piece of fruit<br>- 1 slice of bread<br>- next meal (if served within 30 min) |
| Fast Acting Carbohydrate (15g=one serve) examples: One serve as initial treatment                                                                                                                                                                                                                                                                                                                                                                                                                                                                                                                             | Slow Acting Carbohydrate (15g=one serve) examples: One serve as follow up treatment                                                                                                                                                                                                                                                                                                                                                                                                                                                                                                                                                                                                              |                                                                                   |                                                                                     |                                                                              |                                                                                                                                                               |
| - 100mL Lucozade<br>- 3 teaspoons honey, jam or sugar<br>- 3 glucose tablets                                                                                                                                                                                                                                                                                                                                                                                                                                                                                                                                  | - 250mL plain milk<br>- 2 sweet plain biscuits<br>- 1 tub (200g) yoghurt<br>- 1 piece of fruit<br>- 1 slice of bread<br>- next meal (if served within 30 min)                                                                                                                                                                                                                                                                                                                                                                                                                                                                                                                                    |                                                                                   |                                                                                     |                                                                              |                                                                                                                                                               |

### Guidelines for During Exercise

- Trained individuals have greater reductions in glucose during aerobic exercise than individuals with reduced cardiorespiratory fitness.
- High-intensity exercise or resistance exercise before aerobic exercise will attenuate the decrease in glucose compared to aerobic exercise alone.
- Completing an aerobic exercise cool down after high-intensity or resistance exercise will attenuate the glucose rise compared to performing high-intensity or resistance exercise alone.

| Glucose Level:                 | Below target glucose - Exercise with caution                                                                                                                                                                                                                                                                                                                                                                                                                                                            |
|--------------------------------|---------------------------------------------------------------------------------------------------------------------------------------------------------------------------------------------------------------------------------------------------------------------------------------------------------------------------------------------------------------------------------------------------------------------------------------------------------------------------------------------------------|
| <5.5mmol/L                     | <ul style="list-style-type: none"> <li>- Consume fast acting carbohydrates if next meal not planned within 30 min – one serve per hour with gentle exercise, two serves per hour with moderate-intensity exercise, four serves per hour with vigorous or high-intensity exercise. Alternative approach = 0.3-0.5g carbohydrate per kg of body mass per hour activity with reduced insulin.</li> <li><b>If this occurs frequently, schedule review with Diabetes Healthcare Professional.</b></li> </ul> |
| Glucose Level:                 | Rising glucose - Exercise with caution                                                                                                                                                                                                                                                                                                                                                                                                                                                                  |
| Rises above pre-exercise level | <ul style="list-style-type: none"> <li>- Ensure medications have not been missed.</li> <li>- Rise is more likely with higher intensity exercise such as weight lifting, sprints and racing.</li> <li>- Rise may also be due to food consumed within the last 90 min.</li> <li>- Monitor the rise but be prepared for the fall in the glucose later – may require correction in carbohydrate consumption and/or insulin after exercise.</li> </ul>                                                       |
| Glucose Level:                 | Hypoglycaemia - Not safe to continue exercise                                                                                                                                                                                                                                                                                                                                                                                                                                                           |
| <4.0mmol/L                     | <p>STOP EXERCISING – Consume one serve of fast acting carbohydrate and re-check after 15 min. If glucose is still &lt;4.0mmol/L repeat one serve fast acting carbohydrate. Once glucose is ≥4.0mmol/L consume one serve slow acting carbohydrate if next meal is more than 30 min away.</p> <ul style="list-style-type: none"> <li>- Only resume exercise when glucose is ≥5.5mmol/L.</li> <li><b>- If this occurs frequently, schedule review with a Diabetes Healthcare Professional.</b></li> </ul>  |

### Guidelines for After Exercise

- Risk of hypoglycaemia is elevated for at least 12 h after exercise. Monitor glucose after exercise if there has been an increase in exercise or when performing new exercise.
- If post-exercise hypoglycaemia occurs, treat and confirm resolution then check the glucose level at least every 2 h up to 6 h post exercise.
- Additional monitoring (e.g. for night-time hypoglycaemia) is required when exercising in extreme heat, cold or high altitude, changing exercise type/duration/intensity, and if post-exercise hypoglycaemia has previously occurred.
- If exercising in the afternoon, monitor for the risk of night-time hypoglycaemia.
- If night-time hypoglycaemia occurs, check the glucose level before sleep, once during the night (e.g. 2:00 am), and immediately upon waking.
- If glucose level <7mmol/L before bed, extra carbohydrates should be consumed.
- Adjustment of insulin with post exercise meal or additional carbohydrates following exercise may be required.

If the glucose level is of concern and/or is within orange or red areas of the Action Plan recurrently, the following should be discussed and reviewed with a Diabetes Healthcare Professional.

- |                                                                                                                                                                                                                           |                                                                                                                                                                                                                                                              |
|---------------------------------------------------------------------------------------------------------------------------------------------------------------------------------------------------------------------------|--------------------------------------------------------------------------------------------------------------------------------------------------------------------------------------------------------------------------------------------------------------|
| <ul style="list-style-type: none"> <li>• Type of medications to lower glucose</li> <li>• Timing of medications</li> <li>• Glucose trend prior to exercise</li> <li>• Timing and amount of previous food intake</li> </ul> | <ul style="list-style-type: none"> <li>• Presence and severity of diabetes complications</li> <li>• Use of other medications secondary to diabetes</li> <li>• Intensity, duration and type of exercise</li> <li>• Time of day conducting exercise</li> </ul> |
|---------------------------------------------------------------------------------------------------------------------------------------------------------------------------------------------------------------------------|--------------------------------------------------------------------------------------------------------------------------------------------------------------------------------------------------------------------------------------------------------------|
